# Supplementary material for: Adjustable Underwater Gas Transportation Using Bioinspired Superhydrophobic Elastic String
Source: MDPI journal article supplement (doi:10.3390/coatings12050638), 2022-05-06
Supplement: s1 [file s1]

# Supplementary Materials: Adjustable Underwater Gas Transportation Using Bioinspired Superhydrophobic Elastic String

Yaping Sun <sup>1,2</sup>, Meichen Liu <sup>1</sup>, Xinlei Li <sup>1</sup>, Deshuai Sun <sup>1,\*</sup>, Yanzhi Xia <sup>2</sup> and Zhong Xiong <sup>1,2,\*</sup>

<sup>1</sup> College of Chemistry and Chemical Engineering, Qingdao University, Qingdao 266071, China; 15951005006@163.com (Y.S.); 13853998386@163.com (M.L.); xinleilll@163.com (X.L.)

<sup>2</sup> Institute of Marine Biobased Materials, State Key Laboratory of Bio-Fibers and Eco-Textiles, Qingdao University, Qingdao 266071, China; xiayz@qdu.edu.cn

\* Correspondence: luckysds@163.com (D.S.); xiongzong22@163.com (Z.X.); Tel.: +86-15165429868 (D.S.); +86-15854233595 (Z.X.)

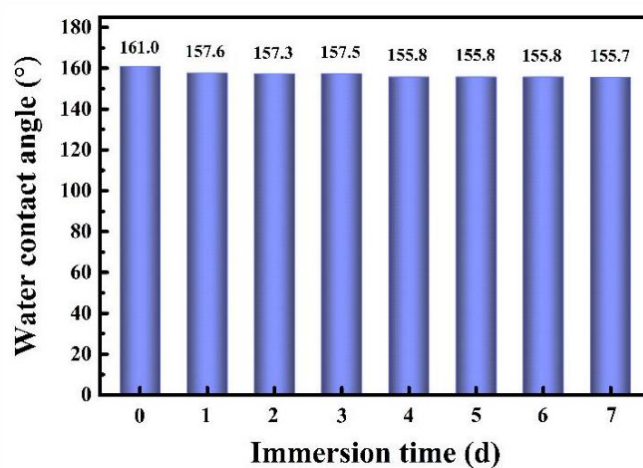

**Figure S1.** Water contact angles of surface-treated strings as a function of immersion time in water.
